# Supplementary material for: A high-fidelity multiresolution digital elevation model for Earth systems
Source: Copernicus journal article supplement (doi:10.5194/gmd-10-239-2017), 2017-01-16
Supplement: Supplementary file [file gmd-10-239-2017-supplement-title-page.pdf › gmd-10-239-2017-supplement-title-page.pdf]

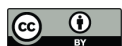

## *Supplement of*

# **A high-fidelity multiresolution digital elevation model for Earth systems**

**Xinqiao Duan et al.**

*Correspondence to:* Lin Li (lilin@whu.edu.cn)

- gmd-10-239-2017-supplement-title-page.pdf
- line\_optimization\_result\_b.gif
- readme.txt
- v\_diagram\_v1.gif
- v\_diagram\_v2.gif
- v\_diagram\_v3.gif

The copyright of individual parts of the supplement might differ from the CC-BY 3.0 licence.
